# Supplementary material for: Bioavailability Assessment of Yarrow Phenolic Compounds Using an In Vitro Digestion/Caco-2 Cell Model: Anti-Inflammatory Activity of Basolateral Fraction
Source: MDPI journal article supplement (doi:10.3390/molecules27238254), 2022-11-26
Supplement: s1 [file s1]

## **Supplementary material**

### **Bioavailability assessment of yarrow phenolic compounds using an in vitro digestion/ Caco-2 cell model: anti-inflammatory activity of basolateral fraction.**

**Marisol Villalva<sup>1</sup>, Laura Jaime<sup>1</sup>, María de las Nieves Siles-Sánchez<sup>1</sup>, Susana Santoyo<sup>1\*</sup>**

<sup>1</sup> Institute of Food Science Research (CIAL). Universidad Autónoma de Madrid (CEI UAM+CSIC). 28049 Madrid, Spain

\* Correspondence: [susana.santoyo@uam.es](mailto:susana.santoyo@uam.es) (S.S.), Tel.: +34 91 001 79 26

**Table S1.** Phenolic compounds identified in yarrow samples by using HPLC-PAD-ESI-QTOF-MS/MS in negative ionization mode.

| No. | Rt    | Compound                                 | Acc. Mass<br>( <i>m/z</i> ) | Theor.<br>Mass ( <i>m/z</i> ) | Error<br>(ppm) | Main fragments ( <i>m/z</i> )          |
|-----|-------|------------------------------------------|-----------------------------|-------------------------------|----------------|----------------------------------------|
| 1   | 12.90 | Neochlorogenic acid *                    | 353.0877                    | 353.0878                      | 0.2            | 191.0561, 179.0379, 135.0454           |
| 2   | 13.35 | Protocatechuic acid *                    | 153.0197                    | 153.0193                      | -2.5           | 109.0299, 153.0197                     |
| 3   | 13.62 | Caftaric acid isomer                     | 311.0405                    | 311.0409                      | 1.0            | 179.0354, 149.0458                     |
| 4   | 13.72 | Caftaric acid *                          | 311.0410                    | 311.0409                      | -0.3           | 179.0353, 149.0460                     |
| 5   | 14.36 | Caffeoylquinic acid isomer I             | 353.0876                    | 353.0878                      | 0.5            | 191.0561, 179.0350                     |
| 6   | 14.94 | Chlorogenic acid *                       | 353.0876                    | 353.0878                      | 0.7            | 191.0559                               |
| 7   | 15.15 | Cryptochlorogenic acid *                 | 353.0876                    | 353.0878                      | 0.6            | 173.0455, 179.0349                     |
| 8   | 15.93 | Vicenin 2 *                              | 593.1513                    | 593.1512                      | -0.2           | 473.1093                               |
| 9   | 17.02 | Caffeoylquinic acid isomer II            | 353.0879                    | 353.0878                      | -0.2           | 191.0565, 161.0248                     |
| 10  | 17.45 | Apigenin hexoside-pentoside I            | 563.1401                    | 563.1406                      | 1.0            | 473.1089, 443.0979                     |
| 11  | 17.88 | Caffeic acid *                           | 179.0349                    | 179.0350                      | 0.4            | 135.0451                               |
| 12  | 18.12 | Schaftoside isomer                       | 563.1401                    | 563.1406                      | 1.0            | 473.1089, 443.0979                     |
| 13  | 18.26 | Schaftoside *                            | 563.1406                    | 563.1406                      | 0.1            | 473.1090, 443.0984                     |
| 14  | 18.85 | Homoorientin *                           | 447.0933                    | 447.0933                      | -0.0           | 357.0614, 327.0509, 429.0826           |
| 15  | 19.32 | Apigenin hexoside-pentoside II           | 563.1408                    | 563.1406                      | -0.3           | 443.0983, 473.1086                     |
| 16  | 19.58 | Luteolin dihexoside I                    | 609.1462                    | 609.1461                      | -0.1           | 447.0931, 327.0509, 357.0615, 285.0405 |
| 17  | 19.90 | 6-hydroxyluteolin-7- <i>O</i> -glucoside | 463.0885                    | 463.0882                      | -0.7           | 301.0351                               |
| 18  | 20.18 | Apigenin dihexoside                      | 593.1511                    | 593.1512                      | 0.2            | 269.0453                               |
| 19  | 21.15 | Quercetin hexoside                       | 463.0883                    | 463.0882                      | -0.2           | 301.0354                               |
| 20  | 21.60 | Luteolin dihexoside II                   | 609.1449                    | 609.1461                      | 1.9            | 285.0406, 447.0930                     |
| 21  | 21.92 | Rutin *                                  | 609.1454                    | 609.1461                      | 1.2            | 301.0351                               |
| 22  | 22.28 | Apigenin hexoside                        | 431.0983                    | 431.0984                      | 0.2            | 311.0559                               |
| 23  | 22.44 | Vitexin *                                | 431.0981                    | 431.0984                      | 0.6            | 311.0562, 341.0666                     |
| 24  | 22.90 | Apigenin hexoside-deoxyhexoside          | 577.1557                    | 577.1563                      | 1.0            | 269.0455                               |
| 25  | 23.47 | Apigenin derivative                      | 445.1141                    | 445.1140                      | -0.1           | 269.0450                               |
| 26  | 23.64 | Luteolin-7- <i>O</i> -glucoside *        | 447.0934                    | 447.0933                      | -0.2           | 285.0403                               |
| 27  | 24.11 | Luteolin-7- <i>O</i> -glucuronide *      | 461.0729                    | 461.0725                      | -0.8           | 285.0404                               |
| 28  | 24.67 | Quercetin hexuronide                     | 477.0678                    | 477.0675                      | -0.7           | 301.0352                               |
| 29  | 25.47 | 3,4-Dicaffeoylquinic acid *              | 515.1195                    | 515.1195                      | -0.0           | 353.0878, 335.0773, 191.0561, 179.0350 |
| 30  | 25.93 | Isorhamnetin hexoside I                  | 477.1035                    | 477.1038                      | 0.8            | 315.0721, 300.0270                     |
| 31  | 26.33 | 1,5-Dicaffeoylquinic acid *              | 515.1195                    | 515.1195                      | -0.0           | 353.0874, 191.0559, 179.0349, 135.0453 |
| 32  | 26.88 | 3,5-Dicaffeoylquinic acid *              | 515.1194                    | 515.1195                      | 0.1            | 353.0872, 191.0561, 179.0351, 135.0455 |
| 33  | 27.60 | Apigenin-7- <i>O</i> -glucoside *        | 431.0983                    | 431.0984                      | 0.2            | 269.0449                               |
| 34  | 27.86 | Luteolin- <i>O</i> -malonylglucoside     | 533.0939                    | 533.0937                      | -0.4           | 489.1037, 285.0403                     |
| 35  | 28.25 | 4,5-Dicaffeoylquinic acid *              | 515.1196                    | 515.1195                      | -0.1           | 353.0877, 191.0561, 179.0350           |
| 36  | 30.37 | Isorhamnetin hexoside II                 | 477.1042                    | 477.1038                      | -0.6           | 315.0720                               |
| 37  | 31.09 | Dicaffeoylquinic acid isomer             | 515.1191                    | 515.1195                      | 0.7            | 353.0878, 191.0565, 179.0353, 173.0459 |
| 38  | 32.04 | Feruloylcaffeoylquinic acid              | 529.1350                    | 529.1351                      | 0.1            | 367.1036, 193.0510, 191.0565           |
| 39  | 32.70 | Tricaffeoylquinic acid                   | 677.1514                    | 677.1512                      | 1.9            | 515.1197, 353.0880                     |
| 40  | 33.61 | Luteolin *                               | 285.0401                    | 285.0405                      | 1.4            | 151.0039, 133.0298                     |
| 41  | 33.80 | Quercetin *                              | 301.0351                    | 301.0354                      | 0.8            | 151.0037, 121.0296, 107.0141           |
| 42  | 35.04 | Methoxyquercetin                         | 315.0507                    | 315.0510                      | 0.6            | 300.0272, 271.0245, 255.0296, 301.0307 |
| 43  | 36.99 | Apigenin *                               | 269.0454                    | 269.0455                      | 0.4            | 151.0039, 225.0558                     |
| 44  | 37.51 | Diosmetin *                              | 299.0554                    | 299.0561                      | 2.4            | 284.0325, 285.0383                     |
| 45  | 38.49 | Trihydroxy dimethoxyflavone              | 329.0665                    | 329.0667                      | 0.5            | 299.0195, 314.0426                     |
| 46  | 40.00 | Centaureidin                             | 359.0768                    | 359.0772                      | 1.0            | 329.0299, 344.0535, 314.0066           |
| 47  | 42.04 | Methoxyacacetin                          | 313.0715                    | 313.0718                      | 0.9            | 283.0245, 298.0476, 284.0278           |
| 48  | 43.12 | Dihydroxy trimethoxyflavone              | 343.0821                    | 343.0823                      | 0.7            | 328.0585, 313.0350                     |
| 49  | 45.51 | Casticin *                               | 373.0925                    | 373.0929                      | 0.9            | 343.0457, 358.0691                     |

Rt, retention time. \* Comparison against its authentic standard

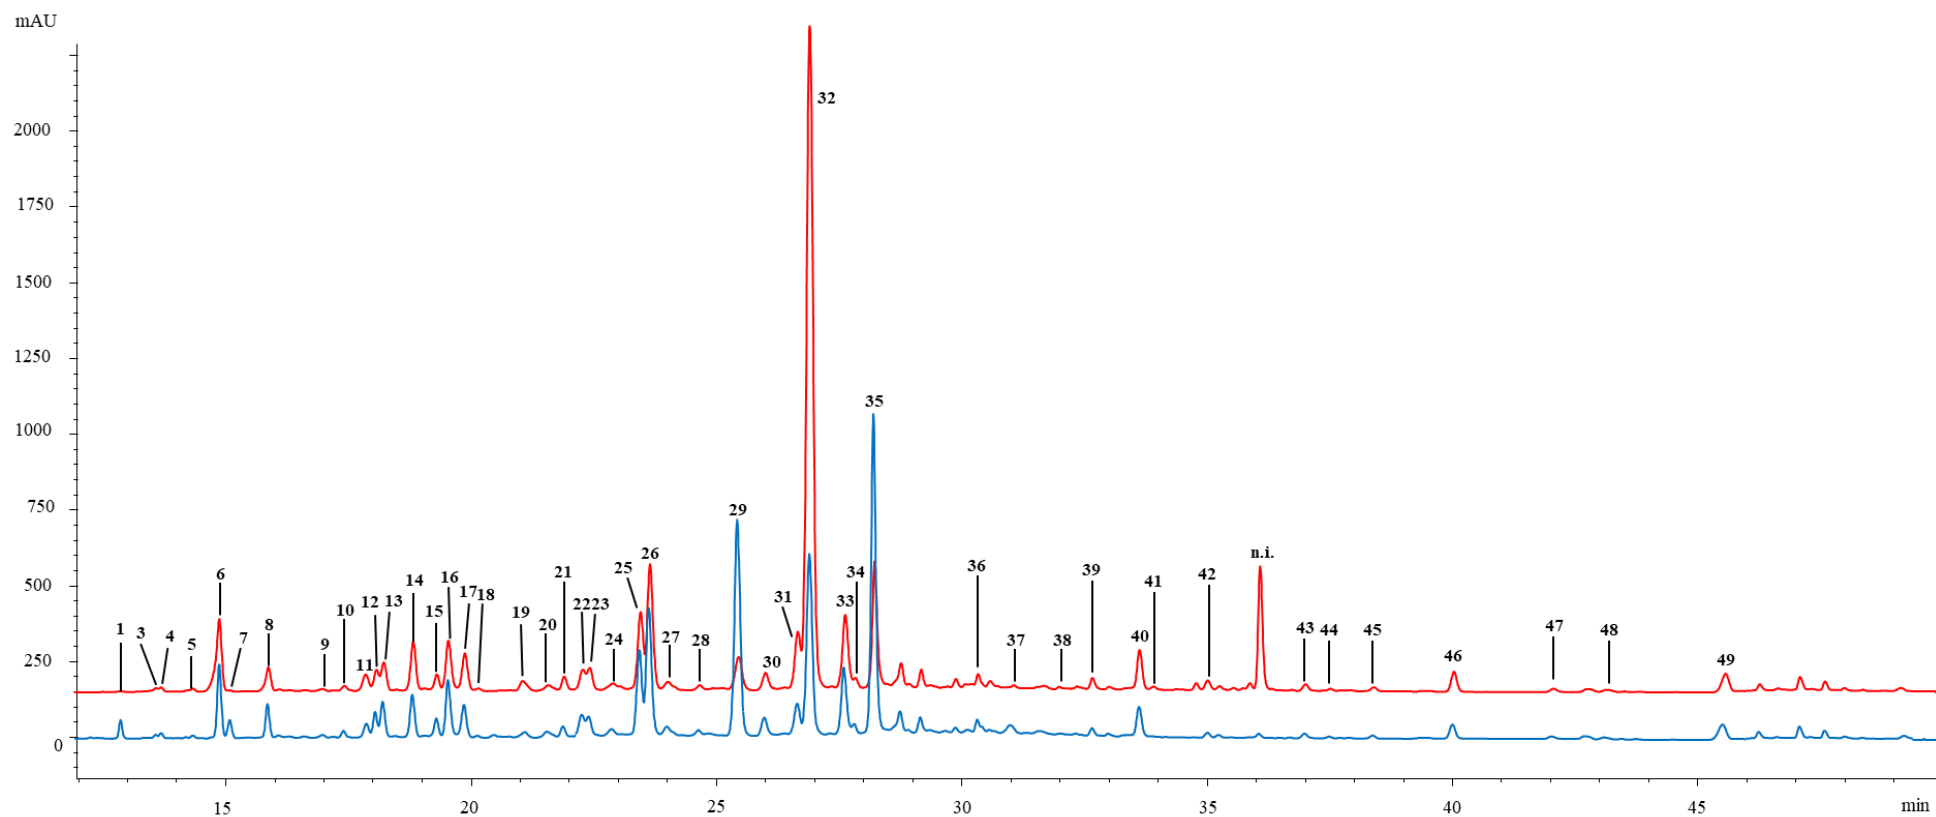

**Figure S1.** HPLC-PAD base peak chromatogram ( $\lambda = 320$  nm) of yarrow enriched-extract before (red line) and after (blue line) the simulated *in vitro* digestion process. n.i.: non-identified compound.
